# Supplementary material
Source: publisher figshare collection journal article supplement (https://sage.figshare.com/ndownloader/files/13569575)
Supplement: Supplementary file 1 [file 13569575]

# Hate Crime Experiences Study: Part 1

These first set of questions refer to your experiences with anti-LGBT hate crimes and incidents which are defined as:

“Any criminal offence, or non-crime incident, which is perceived, by the victim or any other person, to be motivated by a hostility or prejudice based on a person’s sexual orientation or perceived sexual orientation or trans identity or perceived trans identity.”

---

In the past 3 years, how many times have you been verbally abused (e.g., shouted at, called names) by a person who you think was motivated by a prejudice against LGBT people?

- 0 times     1-2 times     3-4 times     5-6 times     7-8 times     9-10 times     11 times or more
- 

In the past 3 years, how many times have you been abused online (e.g., on Twitter, Facebook, discussion boards) by a person who you think was motivated by a prejudice against LGBT people?

- 0 times     1-2 times     3-4 times     5-6 times     7-8 times     9-10 times     11 times or more
- 

In the past 3 years, how many times have you been physically assaulted (e.g., pushed, punched, kicked) by a person who you think was motivated by a prejudice against LGBT people?

- 0 times     1 time     2 times     3 times     4 times     5 times     6 times or more
- 

Thinking about the time(s) when you have been a victim of a hate crime or incident, how severe would you rate your worst experience?

- 1=Very minor     2     3     4     5     6     7= Very severe     N/A I've not been a victim
- 

Page Break

---

Now we would like to know about other people who you know have been victims of anti-LGBT hate crimes and incidents. You don't need to be close friends with the victim(s) but you do need to know of them (i.e., not just seen them on TV)

In the past 3 years, how many people do you know who have been verbally abused (e.g., shouted at, called names) by a person who you think was motivated by a prejudice against LGBT people?

0 people    1-2 people    3-4 people    5-6 people    7-8 people    9-10 people    11 people or more

---

In the past 3 years, how many people do you know who have been abused online (e.g., on Twitter, Facebook, discussion boards) by a person who you think was motivated by a prejudice against LGBT people?

0 people    1-2 people    3-4 people    5-6 people    7-8 people    9-10 people    11 people or more

---

In the past 3 years, how many people do you know who have been physically assaulted (e.g., pushed, punched, kicked) by a person who you think was motivated by a prejudice against LGBT people?

0 people    1 person    2 people    3 people    4 people    5 people    6 people or more

---

In your opinion, how severe would you rate the worst hate crime/incident you've known about?

1=Very minor    2    3    4    5    6    7= Very severe    N/A I don't know of any victims

---

Page Break

---

These next 2 questions refer to hate crimes and incidents reported in the media.

In the past 3 years, how many instances of anti-LGBT hate crimes and incidents would you estimate that you have seen or read about in the media (e.g., TV, radio, Facebook, Twitter, etc.)?

0 instances    1-10 instance    11-20 instances    21-30 instances    31 instances or more

---



I believe anti-LGBT hate crimes and incidents...

|                                                                | 1 =<br>Strongly<br>disagree | 2                     | 3                     | 4                     | 5                     | 6                     | 7 =<br>Strongly<br>agree |
|----------------------------------------------------------------|-----------------------------|-----------------------|-----------------------|-----------------------|-----------------------|-----------------------|--------------------------|
| Pose a physical threat to<br>LGBT people                       | <input type="radio"/>       | <input type="radio"/> | <input type="radio"/> | <input type="radio"/> | <input type="radio"/> | <input type="radio"/> | <input type="radio"/>    |
| Endanger the safety of<br>LGBT people                          | <input type="radio"/>       | <input type="radio"/> | <input type="radio"/> | <input type="radio"/> | <input type="radio"/> | <input type="radio"/> | <input type="radio"/>    |
| Pose a threat to the<br>possessions of LGBT<br>people          | <input type="radio"/>       | <input type="radio"/> | <input type="radio"/> | <input type="radio"/> | <input type="radio"/> | <input type="radio"/> | <input type="radio"/>    |
| Pose a threat to the<br>emotional well-being of<br>LGBT people | <input type="radio"/>       | <input type="radio"/> | <input type="radio"/> | <input type="radio"/> | <input type="radio"/> | <input type="radio"/> | <input type="radio"/>    |
| Pose a threat to the<br>personal rights of LGBT<br>people      | <input type="radio"/>       | <input type="radio"/> | <input type="radio"/> | <input type="radio"/> | <input type="radio"/> | <input type="radio"/> | <input type="radio"/>    |
| Pose a threat to LGBT<br>culture                               | <input type="radio"/>       | <input type="radio"/> | <input type="radio"/> | <input type="radio"/> | <input type="radio"/> | <input type="radio"/> | <input type="radio"/>    |
| Pose a threat to LGBT<br>people's way of life                  | <input type="radio"/>       | <input type="radio"/> | <input type="radio"/> | <input type="radio"/> | <input type="radio"/> | <input type="radio"/> | <input type="radio"/>    |
| Pose a threat to the<br>beliefs and values of<br>LGBT people   | <input type="radio"/>       | <input type="radio"/> | <input type="radio"/> | <input type="radio"/> | <input type="radio"/> | <input type="radio"/> | <input type="radio"/>    |

---

Page Break

Please read the following article which was recently published on a British news website.

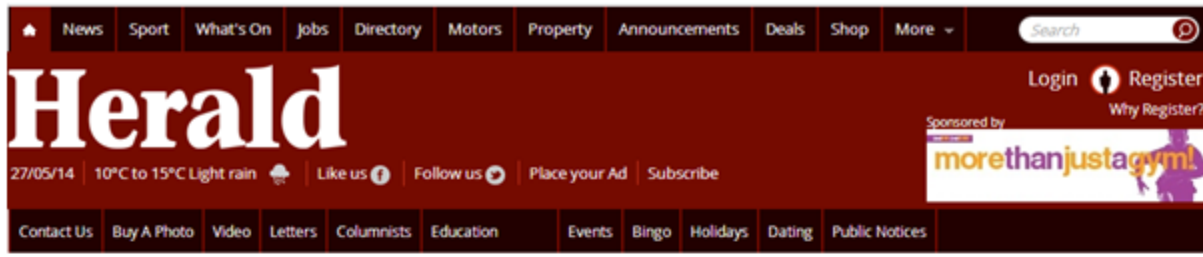

## Gay Man Beaten in Homophobic Attack

**A gay man required stitches after being attacked by two men on Sunday evening.**

Mark Hodgson, 48, said he was leaving a friend's house when he heard two men behind him.

After hearing one of the men make a homophobic comment, Mr Hodgson says he was hit in the face, resulting in a broken nose, and after that he can't remember much.

Police are appealing for witnesses to the assault.

The men are described as white, in their 20s and about 5'7" tall.

Despite having strong support from his friends and family since the attack, Mr Hodgson says he has been scared to go out.

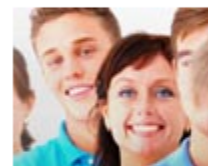

### Find a job

Search for jobs in your area.

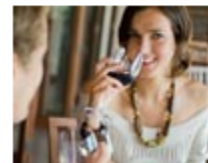

### Today's Deals

Search local deals and offers in your area.



How does reading the article make you feel?

|             | 1 = Not<br>at all     | 2                     | 3                     | 4                     | 5                     | 6                     | 7 =<br>Extremely      |
|-------------|-----------------------|-----------------------|-----------------------|-----------------------|-----------------------|-----------------------|-----------------------|
| Angry       | <input type="radio"/> |
| Afraid      | <input type="radio"/> |
| Embarrassed | <input type="radio"/> |
| Anxious     | <input type="radio"/> |
| Ashamed     | <input type="radio"/> |
| Alarmed     | <input type="radio"/> |
| Guilty      | <input type="radio"/> |
| Outraged    | <input type="radio"/> |
| Annoyed     | <input type="radio"/> |
| Appalled    | <input type="radio"/> |

---

Page Break





And to what extent would you consider...

|                                                                                          | 1 =<br>Strongly<br>disagree | 2                     | 3                     | 4                     | 5                     | 6                     | 7 =<br>Strongly<br>agree |
|------------------------------------------------------------------------------------------|-----------------------------|-----------------------|-----------------------|-----------------------|-----------------------|-----------------------|--------------------------|
| Joining and/or increasing my participation in anti-hate crime groups                     | <input type="radio"/>       | <input type="radio"/> | <input type="radio"/> | <input type="radio"/> | <input type="radio"/> | <input type="radio"/> | <input type="radio"/>    |
| Joining and/or increasing my participation in groups and charities that help LGBT people | <input type="radio"/>       | <input type="radio"/> | <input type="radio"/> | <input type="radio"/> | <input type="radio"/> | <input type="radio"/> | <input type="radio"/>    |
| Becoming more actively involved with groups that advocate LGBT rights                    | <input type="radio"/>       | <input type="radio"/> | <input type="radio"/> | <input type="radio"/> | <input type="radio"/> | <input type="radio"/> | <input type="radio"/>    |
| Using social media (e.g., Twitter) to raise others' awareness of the crime               | <input type="radio"/>       | <input type="radio"/> | <input type="radio"/> | <input type="radio"/> | <input type="radio"/> | <input type="radio"/> | <input type="radio"/>    |
| Telling other people (e.g., family and friends) about the crime                          | <input type="radio"/>       | <input type="radio"/> | <input type="radio"/> | <input type="radio"/> | <input type="radio"/> | <input type="radio"/> | <input type="radio"/>    |
| Naming and shaming the attackers on social media, if I could                             | <input type="radio"/>       | <input type="radio"/> | <input type="radio"/> | <input type="radio"/> | <input type="radio"/> | <input type="radio"/> | <input type="radio"/>    |
| Verbally abusing the offenders if I had the opportunity                                  | <input type="radio"/>       | <input type="radio"/> | <input type="radio"/> | <input type="radio"/> | <input type="radio"/> | <input type="radio"/> | <input type="radio"/>    |
| Physically attacking the offenders if I had the opportunity                              | <input type="radio"/>       | <input type="radio"/> | <input type="radio"/> | <input type="radio"/> | <input type="radio"/> | <input type="radio"/> | <input type="radio"/>    |

These next questions refer to your LGBT identity.

|                                                   | 1 =<br>Strongly<br>disagree | 2                     | 3                     | 4                     | 5                     | 6                     | 7 =<br>Strongly<br>agree |
|---------------------------------------------------|-----------------------------|-----------------------|-----------------------|-----------------------|-----------------------|-----------------------|--------------------------|
| I feel good about being an LGBT individual        | <input type="radio"/>       | <input type="radio"/> | <input type="radio"/> | <input type="radio"/> | <input type="radio"/> | <input type="radio"/> | <input type="radio"/>    |
| I identify with other LGBT people                 | <input type="radio"/>       | <input type="radio"/> | <input type="radio"/> | <input type="radio"/> | <input type="radio"/> | <input type="radio"/> | <input type="radio"/>    |
| I am like other LGBT people                       | <input type="radio"/>       | <input type="radio"/> | <input type="radio"/> | <input type="radio"/> | <input type="radio"/> | <input type="radio"/> | <input type="radio"/>    |
| Being LGBT is an important reflection of who I am | <input type="radio"/>       | <input type="radio"/> | <input type="radio"/> | <input type="radio"/> | <input type="radio"/> | <input type="radio"/> | <input type="radio"/>    |

How old are you? \_\_\_\_\_

What is your gender? Please tick all that apply.

Male  Female  Trans  Intersex  Other, please specify \_\_\_\_\_

What is your sexual orientation?

Asexual  Bisexual  Gay  Lesbian  Queer  Straight  Other, please specify \_\_\_\_\_

What is your ethnic group or background?

Black British  Black Other  Indian  Multiple/Mixed ethnic groups  Pakistani  White British  
 White Irish  Other, please specify \_\_\_\_\_

What is the first part of your postcode? \_\_\_\_\_

END OF SURVEY – DEBRIEF SHEET

# Hate Crime Experiences Study: Part 2

These first set of questions refer to your experiences with anti-LGBT hate crimes and incidents which are defined as:

“Any criminal offence, or non-crime incident, which is perceived, by the victim or any other person, to be motivated by a hostility or prejudice based on a person’s sexual orientation or perceived sexual orientation or trans identity or perceived trans identity.”

---

In the past 3 months, how many times have you been verbally abused (e.g., shouted at, called names) by a person who you think was motivated by a prejudice against LGBT people?

- 0 times     1 time     2 times     3 times     4 times     5 times     6 times or more
- 

In the past 3 months, how many times have you been abused online (e.g., on Twitter, Facebook, discussion boards) by a person who you think was motivated by a prejudice against LGBT people?

- 0 times     1 time     2 times     3 times     4 times     5 times     6 times or more
- 

In the past 3 months, how many times have you been physically assaulted (e.g., pushed, punched, kicked) by a person who you think was motivated by a prejudice against LGBT people?

- 0 times     1 time     2 times     3 times     4 times     5 times     6 times or more
- 

Thinking about the time(s) when you have been a victim of a hate crime or incident, how severe would you rate your worst experience?

- 1=Very minor     2     3     4     5     6     7= Very severe     N/A I've not been a victim
- 

Page Break

---

Now we would like to know about other people who you know have been victims of anti-LGBT hate crimes and incidents. You don't need to be close friends with the victim(s) but you do need to know of them (i.e., not just seen them on TV)

In the past 3 months, how many people do you know who have been verbally abused (e.g., shouted at, called names) by a person who you think was motivated by a prejudice against LGBT people?

- 0 people    1 person    2 people    3 people    4 people    5 people    6 people or more
- 

In the past 3 months, how many people do you know who have been abused online (e.g., on Twitter, Facebook, discussion boards) by a person who you think was motivated by a prejudice against LGBT people?

- 0 people    1 person    2 people    3 people    4 people    5 people    6 people or more
- 

In the past 3 months, how many people do you know who have been physically assaulted (e.g., pushed, punched, kicked) by a person who you think was motivated by a prejudice against LGBT people?

- 0 people    1 person    2 people    3 people    4 people    5 people    6 people or more
- 

In your opinion, how severe would you rate the worst hate crime/incident you've known about?

- 1=Very minor    2    3    4    5    6    7= Very severe    N/A I don't know of any victims
- 

Page Break

---

These next 2 questions refer to hate crimes and incidents reported in the media.

In the past 3 months, how many instances of anti-LGBT hate crimes and incidents would you estimate that you have seen or read about in the media (e.g., TV, radio, Facebook, Twitter, etc.)?

- 0 instances    1-2 instances    3-4 instances    5-6 instances    7-8 instances    9-10 instances  
 11 instances or more
-



I believe anti-LGBT hate crimes and incidents...

|                                                                | 1 =<br>Strongly<br>disagree | 2                     | 3                     | 4                     | 5                     | 6                     | 7 =<br>Strongly<br>agree |
|----------------------------------------------------------------|-----------------------------|-----------------------|-----------------------|-----------------------|-----------------------|-----------------------|--------------------------|
| Pose a physical threat to<br>LGBT people                       | <input type="radio"/>       | <input type="radio"/> | <input type="radio"/> | <input type="radio"/> | <input type="radio"/> | <input type="radio"/> | <input type="radio"/>    |
| Endanger the safety of<br>LGBT people                          | <input type="radio"/>       | <input type="radio"/> | <input type="radio"/> | <input type="radio"/> | <input type="radio"/> | <input type="radio"/> | <input type="radio"/>    |
| Pose a threat to the<br>possessions of LGBT<br>people          | <input type="radio"/>       | <input type="radio"/> | <input type="radio"/> | <input type="radio"/> | <input type="radio"/> | <input type="radio"/> | <input type="radio"/>    |
| Pose a threat to the<br>emotional well-being of<br>LGBT people | <input type="radio"/>       | <input type="radio"/> | <input type="radio"/> | <input type="radio"/> | <input type="radio"/> | <input type="radio"/> | <input type="radio"/>    |
| Pose a threat to the<br>personal rights of LGBT<br>people      | <input type="radio"/>       | <input type="radio"/> | <input type="radio"/> | <input type="radio"/> | <input type="radio"/> | <input type="radio"/> | <input type="radio"/>    |
| Pose a threat to LGBT<br>culture                               | <input type="radio"/>       | <input type="radio"/> | <input type="radio"/> | <input type="radio"/> | <input type="radio"/> | <input type="radio"/> | <input type="radio"/>    |
| Pose a threat to LGBT<br>people's way of life                  | <input type="radio"/>       | <input type="radio"/> | <input type="radio"/> | <input type="radio"/> | <input type="radio"/> | <input type="radio"/> | <input type="radio"/>    |
| Pose a threat to the<br>beliefs and values of<br>LGBT people   | <input type="radio"/>       | <input type="radio"/> | <input type="radio"/> | <input type="radio"/> | <input type="radio"/> | <input type="radio"/> | <input type="radio"/>    |

---

Page Break

Please read the following article which was published on a British news website.

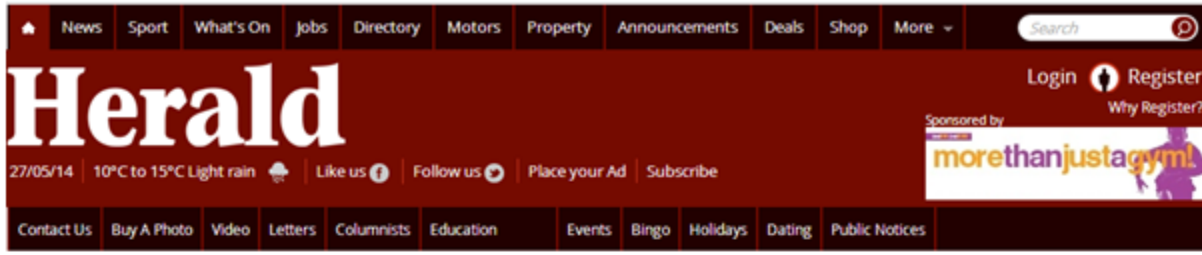

# Gay Man Beaten in Homophobic Attack

**A gay man required stitches after being attacked by two men on Sunday evening.**

Mark Hodgson, 48, said he was leaving a friend's house when he heard two men behind him.

After hearing one of the men make a homophobic comment, Mr Hodgson says he was hit in the face, resulting in a broken nose, and after that he can't remember much.

Police are appealing for witnesses to the assault.

The men are described as white, in their 20s and about 5'7" tall.

Despite having strong support from his friends and family since the attack, Mr Hodgson says he has been scared to go out.

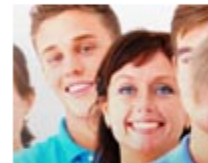

## Find a job

Search for jobs in your area.

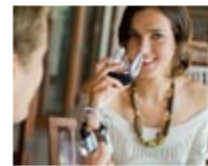

## Today's Deals

Search local deals and offers in your area.

---

Page Break





How does reading the article make you feel?

|             | 1 = Not<br>at all     | 2                     | 3                     | 4                     | 5                     | 6                     | 7 =<br>Extremely      |
|-------------|-----------------------|-----------------------|-----------------------|-----------------------|-----------------------|-----------------------|-----------------------|
| Angry       | <input type="radio"/> |
| Afraid      | <input type="radio"/> |
| Embarrassed | <input type="radio"/> |
| Anxious     | <input type="radio"/> |
| Ashamed     | <input type="radio"/> |
| Alarmed     | <input type="radio"/> |
| Guilty      | <input type="radio"/> |
| Outraged    | <input type="radio"/> |
| Annoyed     | <input type="radio"/> |
| Appalled    | <input type="radio"/> |

---

Page Break



And to what extent would you consider...

|                                                                                          | 1 =<br>Strongly<br>disagree | 2                     | 3                     | 4                     | 5                     | 6                     | 7 =<br>Strongly<br>agree |
|------------------------------------------------------------------------------------------|-----------------------------|-----------------------|-----------------------|-----------------------|-----------------------|-----------------------|--------------------------|
| Joining and/or increasing my participation in anti-hate crime groups                     | <input type="radio"/>       | <input type="radio"/> | <input type="radio"/> | <input type="radio"/> | <input type="radio"/> | <input type="radio"/> | <input type="radio"/>    |
| Joining and/or increasing my participation in groups and charities that help LGBT people | <input type="radio"/>       | <input type="radio"/> | <input type="radio"/> | <input type="radio"/> | <input type="radio"/> | <input type="radio"/> | <input type="radio"/>    |
| Becoming more actively involved with groups that advocate LGBT rights                    | <input type="radio"/>       | <input type="radio"/> | <input type="radio"/> | <input type="radio"/> | <input type="radio"/> | <input type="radio"/> | <input type="radio"/>    |
| Using social media (e.g., Twitter) to raise others' awareness of the crime               | <input type="radio"/>       | <input type="radio"/> | <input type="radio"/> | <input type="radio"/> | <input type="radio"/> | <input type="radio"/> | <input type="radio"/>    |
| Telling other people (e.g., family and friends) about the crime                          | <input type="radio"/>       | <input type="radio"/> | <input type="radio"/> | <input type="radio"/> | <input type="radio"/> | <input type="radio"/> | <input type="radio"/>    |
| Naming and shaming the attackers on social media, if I could                             | <input type="radio"/>       | <input type="radio"/> | <input type="radio"/> | <input type="radio"/> | <input type="radio"/> | <input type="radio"/> | <input type="radio"/>    |
| Verbally abusing the offenders if I had the opportunity                                  | <input type="radio"/>       | <input type="radio"/> | <input type="radio"/> | <input type="radio"/> | <input type="radio"/> | <input type="radio"/> | <input type="radio"/>    |
| Physically attacking the offenders if I had the opportunity                              | <input type="radio"/>       | <input type="radio"/> | <input type="radio"/> | <input type="radio"/> | <input type="radio"/> | <input type="radio"/> | <input type="radio"/>    |





These next questions refer to your LGBT identity.

|                                                   | 1 =<br>Strongly<br>disagree | 2                     | 3                     | 4                     | 5                     | 6                     | 7 =<br>Strongly<br>agree |
|---------------------------------------------------|-----------------------------|-----------------------|-----------------------|-----------------------|-----------------------|-----------------------|--------------------------|
| I feel good about being an LGBT individual        | <input type="radio"/>       | <input type="radio"/> | <input type="radio"/> | <input type="radio"/> | <input type="radio"/> | <input type="radio"/> | <input type="radio"/>    |
| I identify with other LGBT people                 | <input type="radio"/>       | <input type="radio"/> | <input type="radio"/> | <input type="radio"/> | <input type="radio"/> | <input type="radio"/> | <input type="radio"/>    |
| I am like other LGBT people                       | <input type="radio"/>       | <input type="radio"/> | <input type="radio"/> | <input type="radio"/> | <input type="radio"/> | <input type="radio"/> | <input type="radio"/>    |
| Being LGBT is an important reflection of who I am | <input type="radio"/>       | <input type="radio"/> | <input type="radio"/> | <input type="radio"/> | <input type="radio"/> | <input type="radio"/> | <input type="radio"/>    |

How old are you? \_\_\_\_\_

What is your gender? Please tick all that apply.

Male  Female  Trans  Intersex  Other, please specify \_\_\_\_\_

What is your sexual orientation?

Asexual  Bisexual  Gay  Lesbian  Queer  Straight  Other, please specify \_\_\_\_\_

What is your ethnic group or background?

Black British  Black Other  Indian  Multiple/Mixed ethnic groups  Pakistani  White British

White Irish  Other, please specify \_\_\_\_\_

What is the first part of your postcode? \_\_\_\_\_

END OF SURVEY – DEBRIEF SHEET
